# Supplementary material for: Discovery of Single Nucleotide Polymorphisms for Resistance to Abnormal Vertical Growth in Macadamia
Source: Front Plant Sci. 2021 Dec 24;12:756815. doi: 10.3389/fpls.2021.756815 (PMC8739493; doi:10.3389/fpls.2021.756815)
Supplement: Supplementary file 1 [file Table_1.xlsx]

## Sheet: Sheet1
Supplementary Table 1 | Genotypic data of ten SNPs in wild Macadamia integrifolia and M. tetraphylla accessions. ("0" = homozygous allele 1, "1" = homozygous allele 2, "2" = heterozygous, "-" = null allele).
		SNP No
CloneID	Populations	1	2	3	4	5	6	7	8	9	10
MCM1	Wild M. integrifolia	-	0	-	0	-	0	1	0	0	2
MCM2	Wild M. integrifolia	-	0	0	-	-	0	1	0	0	-
MCM3	Wild M. integrifolia	-	-	0	-	-	0	1	0	0	-
MCM4	Wild M. integrifolia	-	0	-	-	-	0	1	1	-	1
MCM5	Wild M. integrifolia	0	0	-	-	-	0	1	1	-	-
MCM6	Wild M. integrifolia	1	0	0	-	0	0	1	0	0	-
MCM7	Wild M. integrifolia	0	0	-	-	-	0	1	-	-	-
MCM8	Wild M. integrifolia	0	0	0	-	-	0	1	0	0	-
MCM9	Wild M. integrifolia	-	-	0	-	-	0	1	1	-	1
MCM10	Wild M. integrifolia	-	0	0	0	0	0	1	-	-	0
MCM11	Wild M. integrifolia	-	0	-	0	-	0	1	0	0	2
MCM12	Wild M. integrifolia	-	0	0	0	0	0	1	1	-	0
MCM13	Wild M. integrifolia	-	1	0	-	-	0	0	-	-	-
MCM14	Wild M. integrifolia	-	0	0	-	-	0	0	0	0	1
MCM15	Wild M. integrifolia	-	0	0	-	-	0	1	1	-	-
MCM16	Wild M. integrifolia	0	0	-	-	-	-	1	2	0	-
MCM17	Wild M. integrifolia	-	-	0	0	-	0	-	0	0	0
MCM18	Wild M. integrifolia	0	0	0	-	-	0	1	-	-	1
MCM19	Wild M. integrifolia	-	0	-	-	0	0	1	1	-	-
MCM20	Wild M. integrifolia	-	0	0	-	0	0	1	0	0	-
MCM21	Wild M. integrifolia	-	0	0	0	-	0	0	0	0	0
MCM22	Wild M. integrifolia	0	-	-	-	-	0	1	0	0	-
MCM23	Wild M. integrifolia	0	-	-	0	-	0	-	2	0	0
MCM24	Wild M. integrifolia	-	0	0	-	-	0	-	0	0	1
MCM25	Wild M. integrifolia	0	-	0	-	-	0	-	0	0	1
MCM26	Wild M. integrifolia	0	0	0	-	0	0	1	1	-	-
MCM27	Wild M. integrifolia	-	-	0	-	-	0	-	0	0	-
MCM28	Wild M. integrifolia	0	0	0	-	-	-	1	0	0	-
MCM29	Wild M. integrifolia	-	-	0	0	-	0	1	0	0	0
MCM30	Wild M. integrifolia	0	0	0	-	-	0	1	0	0	-
MCM31	Wild M. integrifolia	-	-	0	0	-	0	1	0	0	0
MCM32	Wild M. integrifolia	-	0	0	-	-	0	0	0	0	-
MCM33	Wild M. integrifolia	0	-	0	0	-	0	0	2	0	0
MCM34	Wild M. integrifolia	0	-	0	-	-	-	1	0	0	-
MCM35	Wild M. integrifolia	0	0	0	-	-	-	1	1	-	-
MCM36	Wild M. integrifolia	0	0	0	0	-	-	1	1	-	0
MCM37	Wild M. integrifolia	-	0	-	-	-	-	-	0	0	1
MCM38	Wild M. integrifolia	2	-	-	-	-	0	1	2	0	-
MCM39	Wild M. integrifolia	-	0	0	-	-	-	1	1	-	-
MCM40	Wild M. integrifolia	0	0	0	0	-	0	1	0	0	0
MCM41	Wild M. integrifolia	-	0	0	0	0	0	1	0	0	0
MCM42	Wild M. integrifolia	-	0	0	0	-	0	1	0	0	0
MCM43	Wild M. integrifolia	-	-	0	0	0	0	1	1	-	0
MCM44	Wild M. integrifolia	1	0	0	-	0	0	1	0	0	-
MCM45	Wild M. integrifolia	0	0	0	0	0	0	1	1	-	0
MCM46	Wild M. integrifolia	-	0	0	-	-	0	1	-	-	-
MCM47	Wild M. integrifolia	-	0	0	0	-	0	0	0	0	0
MCM48	Wild M. integrifolia	0	-	0	-	-	-	1	2	0	-
MCM49	Wild M. integrifolia	0	-	-	0	0	0	1	-	-	0
MCM50	Wild M. integrifolia	0	-	0	0	0	0	1	0	0	0
MCM51	Wild M. integrifolia	0	0	0	0	-	0	0	0	0	0
MCM52	Wild M. integrifolia	0	0	0	-	-	0	1	0	0	-
MCM53	Wild M. integrifolia	-	0	0	0	-	0	1	0	0	0
MCM54	Wild M. integrifolia	-	0	-	0	-	0	1	0	0	0
MCM55	Wild M. integrifolia	-	-	0	0	0	0	1	0	0	0
MCM56	Wild M. integrifolia	-	-	-	0	-	0	1	0	0	0
MCM57	Wild M. integrifolia	-	0	0	0	-	0	1	0	0	0
MCM58	Wild M. integrifolia	0	0	0	0	-	0	1	0	0	0
MCM59	Wild M. integrifolia	0	0	0	0	1	0	1	0	0	0
MCM60	Wild M. integrifolia	0	0	-	-	-	0	1	1	-	1
MCM61	Wild M. integrifolia	-	0	0	-	-	0	1	0	0	-
MCM62	Wild M. integrifolia	-	-	0	-	-	0	1	0	0	-
MCM63	Wild M. integrifolia	0	0	-	0	-	0	1	0	0	0
MCM64	Wild M. integrifolia	0	0	0	-	-	-	1	2	0	-
MCM65	Wild M. integrifolia	0	0	0	0	0	0	1	1	-	0
MCM66	Wild M. integrifolia	0	0	0	-	-	0	1	1	-	-
MCM67	Wild M. integrifolia	0	0	0	-	-	0	1	-	-	-
MCM68	Wild M. integrifolia	0	-	0	0	0	0	1	2	0	0
MCM69	Wild M. integrifolia	1	0	0	-	0	0	1	0	0	-
MCM70	Wild M. integrifolia	-	0	0	-	-	0	1	1	-	-
MCM71	Wild M. integrifolia	0	-	0	-	-	0	1	0	0	1
MCM72	Wild M. integrifolia	0	-	0	0	0	0	1	2	0	0
MCM73	Wild M. integrifolia	-	0	0	0	-	-	0	0	0	0
MCM74	Wild M. integrifolia	0	0	-	0	-	0	1	0	0	0
MCM75	Wild M. integrifolia	0	0	0	0	-	0	1	0	0	0
MCM76	Wild M. integrifolia	-	0	0	-	-	0	0	0	0	1
MCM77	Wild M. integrifolia	-	0	0	-	0	0	1	1	-	-
MCM78	Wild M. integrifolia	-	0	-	0	-	0	1	0	0	0
MCM79	Wild M. integrifolia	-	0	0	0	0	0	1	1	-	0
MCM80	Wild M. integrifolia	0	0	0	-	-	0	0	0	0	-
MCM81	Wild M. integrifolia	-	0	0	0	-	0	1	0	0	2
MCM82	Wild M. integrifolia	-	0	-	0	-	0	1	0	0	0
MCM83	Wild M. integrifolia	0	0	0	-	-	0	1	1	-	1
MCM84	Wild M. integrifolia	-	0	-	-	-	0	0	0	0	-
MCM85	Wild M. integrifolia	0	-	0	-	1	0	1	0	0	-
MCM86	Wild M. integrifolia	0	0	0	0	1	0	1	0	0	0
MCM87	Wild M. integrifolia	-	0	-	-	-	0	1	-	-	-
MCM88	Wild M. integrifolia	0	0	-	-	-	0	1	-	-	-
MCM89	Wild M. integrifolia	-	0	0	0	-	0	1	2	0	0
MCM90	Wild M. integrifolia	0	-	-	-	-	0	1	0	0	-
MCM91	Wild M. tetraphylla	-	0	0	-	-	-	0	0	0	1
MCM92	Wild M. tetraphylla	-	0	1	-	-	0	0	0	0	1
MCM93	Wild M. tetraphylla	-	0	0	-	-	0	2	0	0	1
MCM94	Wild M. tetraphylla	-	0	0	-	-	0	0	0	0	-
MCM95	Wild M. tetraphylla	-	0	0	-	-	0	0	0	0	-
MCM96	Wild M. tetraphylla	-	0	0	1	-	0	0	0	0	-
MCM97	Wild M. tetraphylla	-	0	0	-	-	0	2	0	0	1
MCM98	Wild M. tetraphylla	-	0	0	-	-	0	2	0	0	-
MCM99	Wild M. tetraphylla	-	0	0	-	-	0	0	0	0	1
MCM100	Wild M. tetraphylla	-	0	0	-	-	0	0	0	0	-
MCM101	Wild M. tetraphylla	-	0	0	-	-	0	0	0	0	-
MCM102	Wild M. tetraphylla	-	0	0	-	-	0	0	0	0	1
MCM103	Wild M. tetraphylla	0	0	0	-	-	0	2	0	0	1
MCM104	Wild M. tetraphylla	-	0	0	-	-	0	0	0	0	-
MCM105	Wild M. tetraphylla	-	0	0	0	-	0	0	0	0	0
MCM106	Wild M. tetraphylla	-	0	0	-	-	0	2	0	0	1
MCM107	Wild M. tetraphylla	-	0	0	1	-	0	0	0	0	-
MCM108	Wild M. tetraphylla	-	0	0	-	-	0	0	0	0	-
MCM109	Wild M. tetraphylla	-	0	0	-	-	0	2	0	0	1
MCM110	Wild M. tetraphylla	-	0	0	-	-	0	2	0	0	-
MCM111	Wild M. tetraphylla	-	0	0	-	0	0	0	0	0	-
MCM112	Wild M. tetraphylla	-	0	0	-	-	0	1	0	0	1
MCM113	Wild M. tetraphylla	-	0	0	-	-	0	0	0	0	1
MCM114	Wild M. tetraphylla	-	0	0	-	-	0	0	0	0	-
MCM115	Wild M. tetraphylla	-	0	0	-	-	-	0	-	-	-
MCM116	Wild M. tetraphylla	-	0	0	-	-	0	-	0	0	-
MCM117	Wild M. tetraphylla	-	0	0	-	-	-	0	0	0	-
MCM118	Wild M. tetraphylla	0	0	0	-	-	0	2	0	0	1
MCM119	Wild M. tetraphylla	-	0	0	-	0	-	2	-	-	-
MCM120	Wild M. tetraphylla	-	0	0	-	-	0	0	0	0	-
MCM121	Wild M. tetraphylla	-	0	0	-	-	-	2	0	0	1
MCM122	Wild M. tetraphylla	-	0	0	-	-	0	0	0	0	-
MCM123	Wild M. tetraphylla	-	0	-	-	-	0	2	0	0	1
MCM124	Wild M. tetraphylla	-	0	-	-	-	0	0	0	0	-
MCM125	Wild M. tetraphylla	-	0	0	-	-	0	2	0	0	-
MCM126	Wild M. tetraphylla	-	0	0	-	-	0	2	0	0	-
MCM127	Wild M. tetraphylla	-	0	0	-	-	0	0	0	0	-
MCM128	Wild M. tetraphylla	-	0	0	-	-	0	1	2	0	1
MCM129	Wild M. tetraphylla	-	0	0	-	-	0	0	0	0	1
MCM130	Wild M. tetraphylla	-	0	0	-	-	0	1	0	0	1
MCM131	Wild M. tetraphylla	-	0	0	-	-	0	2	0	0	1
MCM132	Wild M. tetraphylla	-	0	0	-	-	0	0	0	0	-
MCM133	Wild M. tetraphylla	-	0	0	-	-	0	0	0	0	-
MCM134	Wild M. tetraphylla	-	0	0	-	-	0	0	0	0	-
MCM135	Wild M. tetraphylla	-	0	0	-	-	0	-	0	0	1
MCM136	Wild M. tetraphylla	-	0	0	-	-	0	0	0	0	1
MCM137	Wild M. tetraphylla	-	0	0	-	-	0	0	0	0	1
MCM138	Wild M. tetraphylla	-	0	0	-	-	0	2	0	0	-
MCM139	Wild M. tetraphylla	-	0	2	-	-	0	0	0	0	-
MCM140	Wild M. tetraphylla	-	0	-	-	-	-	2	0	0	1
MCM141	Wild M. tetraphylla	-	0	0	-	-	0	0	0	0	1
MCM142	Wild M. tetraphylla	-	0	0	-	-	0	1	0	0	-
MCM143	Wild M. tetraphylla	-	0	0	-	-	0	0	0	0	-
MCM144	Wild M. tetraphylla	-	0	0	-	-	0	2	0	0	-
MCM145	Wild M. tetraphylla	-	0	0	-	-	0	0	0	0	-
MCM146	Wild M. tetraphylla	-	0	0	-	-	0	0	0	0	1
MCM147	Wild M. tetraphylla	-	0	0	-	-	0	0	0	0	-
MCM148	Wild M. tetraphylla	-	0	0	-	-	0	0	0	0	1
MCM149	Wild M. tetraphylla	-	0	0	-	-	0	0	0	0	1
MCM150	Wild M. tetraphylla	-	0	0	-	-	0	2	0	0	-
MCM151	Wild M. tetraphylla	-	0	0	-	-	0	0	0	0	1
MCM152	Wild M. tetraphylla	-	0	0	-	-	0	0	0	0	-
MCM153	Wild M. tetraphylla	-	0	0	-	-	0	0	0	0	-
MCM154	Wild M. tetraphylla	-	0	2	-	-	0	0	0	0	1
MCM155	Wild M. tetraphylla	-	0	0	-	-	0	1	0	0	-
MCM156	Wild M. tetraphylla	-	0	0	-	-	0	0	0	0	1
MCM157	Wild M. tetraphylla	-	0	0	-	-	0	2	0	0	1
MCM158	Wild M. tetraphylla	-	0	0	-	-	0	0	0	0	1
MCM159	Wild M. tetraphylla	-	0	0	-	-	0	1	0	0	-
MCM160	Wild M. tetraphylla	-	0	0	-	-	0	0	0	0	1
MCM161	Wild M. tetraphylla	-	0	0	-	-	0	0	0	0	1
MCM162	Wild M. tetraphylla	-	0	0	-	-	0	0	0	0	1
MCM163	Wild M. tetraphylla	-	0	0	-	-	0	2	0	0	-
MCM164	Wild M. tetraphylla	-	0	2	-	-	0	0	0	0	1
MCM165	Wild M. tetraphylla	-	0	0	-	0	0	0	0	0	1
MCM166	Wild M. tetraphylla	-	0	0	-	-	0	0	0	0	-
MCM167	Wild M. tetraphylla	-	0	0	-	-	0	0	0	0	1
MCM168	Wild M. tetraphylla	-	0	0	-	-	0	2	0	0	1
MCM169	Wild M. tetraphylla	-	0	0	-	-	0	2	0	0	-
MCM170	Wild M. tetraphylla	-	0	0	-	-	0	0	-	-	1
MCM171	Wild M. tetraphylla	-	0	-	-	-	0	0	0	0	-
MCM172	Wild M. tetraphylla	-	0	-	-	-	0	0	0	0	1
MCM173	Wild M. tetraphylla	-	0	0	1	-	0	0	0	0	1
MCM174	Wild M. tetraphylla	-	0	-	0	-	0	2	0	0	0
MCM175	Wild M. tetraphylla	-	0	0	-	-	0	0	0	0	-
MCM176	Wild M. tetraphylla	-	0	-	-	-	2	0	0	0	1
MCM177	Wild M. tetraphylla	-	0	-	0	-	0	0	0	0	2
MCM178	Wild M. tetraphylla	-	0	0	-	-	0	2	0	0	-
MCM179	Wild M. tetraphylla	-	0	-	-	-	0	0	0	0	1
MCM180	Wild M. tetraphylla	-	0	1	-	-	0	0	0	0	1
